# Supplementary material for: SARS-CoV-2 Reinfection and Severity of the Disease: A Systematic Review and Meta-Analysis
Source: MDPI journal article supplement (doi:10.3390/v15040967), 2023-04-14
Supplement: s1 [file s1]

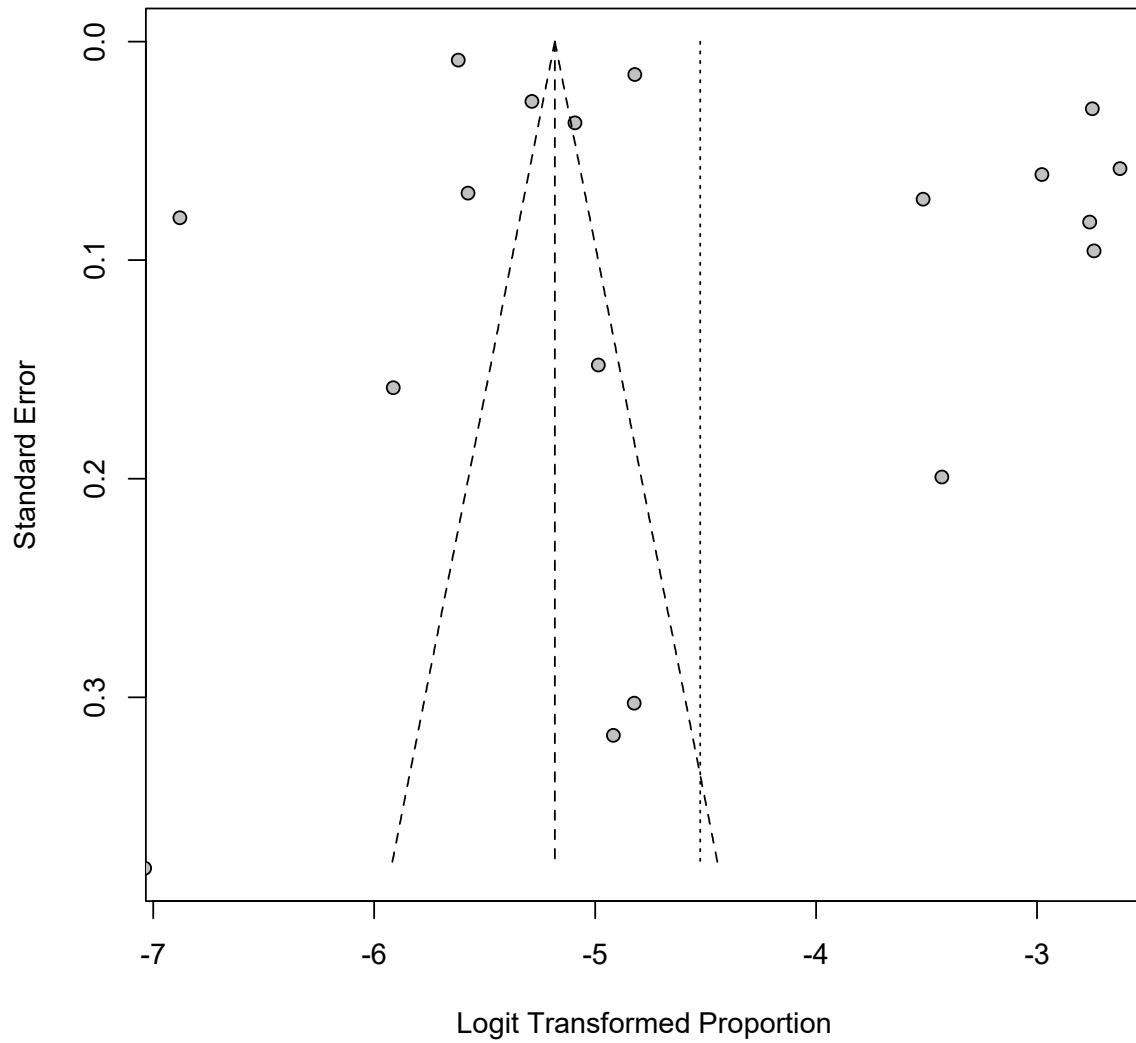

**Supplementary Figure S1.** Asymmetric funnel plot showing the relationship between the 18 studies included in the metanalysis on SARS-CoV-2 reinfection rate.

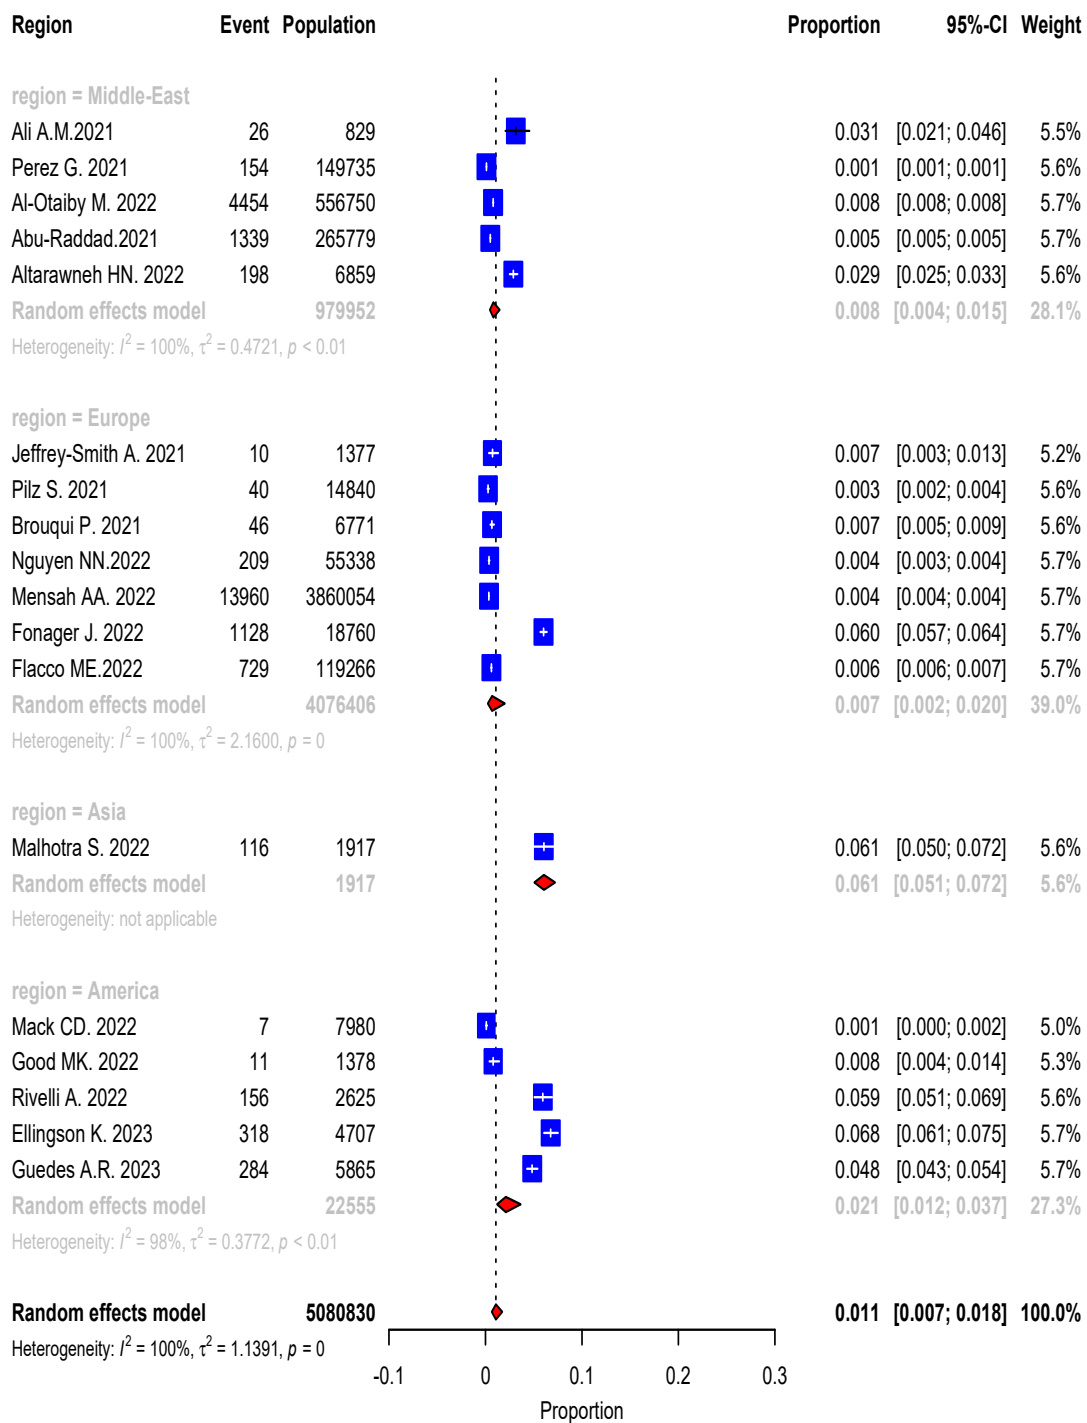

**Supplementary Figure S2.** Forest plot of SARS-CoV-2 reinfection rate according to region where studies took place (18 cohort studies).

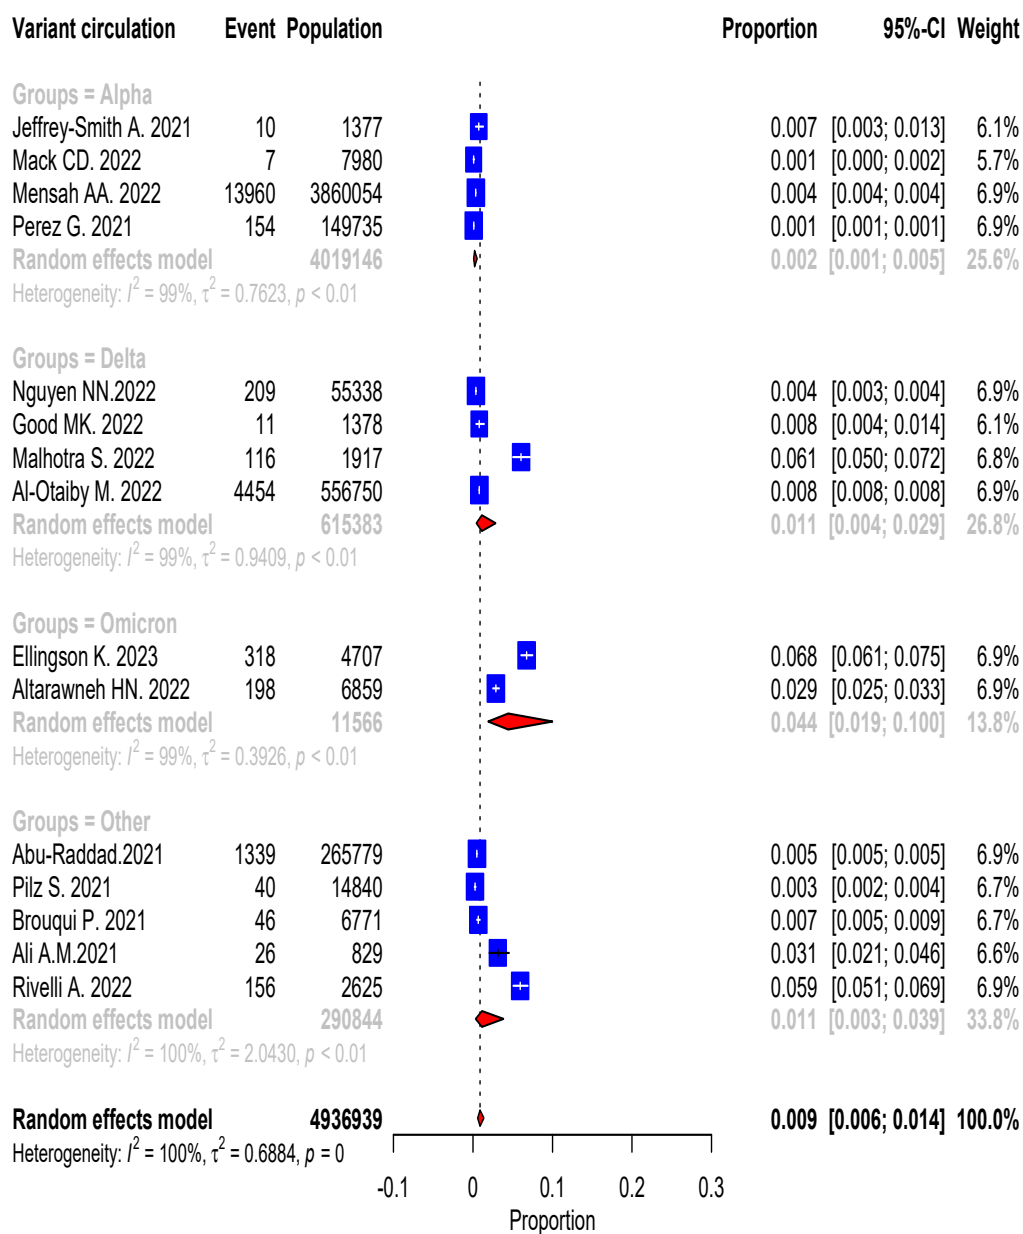

**Supplementary Figure S3.** Forest plot of SARS-CoV-2 reinfection rate according to most frequent SARS-CoV-2 circulating at the time of reinfection (15 studies).

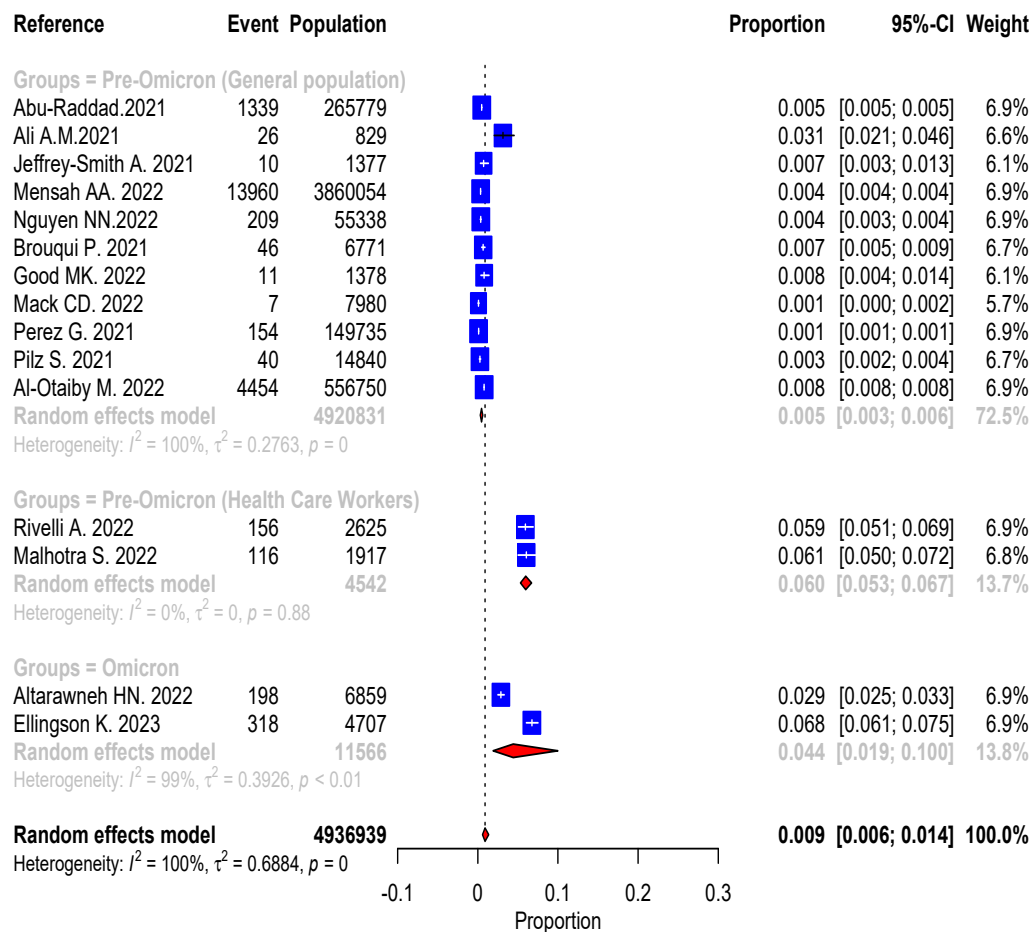

**Supplementary Figure S4.** Forest plot of SARS-CoV-2 reinfection rate during the pre-Omicron period and Omicron period (15 studies).

**Supplementary Table S1.** Characteristics of included studies.

| Reference                | Type of study | Country and setting          | Period of study                     | Number of reinfection cases | Vaccination status in reinfected patients | Number of discharged patients | Vaccination status in discharged patients | Reinfection rate (%) | Discharged patients |           |               | Reinfected patients                          |           |                                                                                                                 | Length of time between two episodes of infection (days) | Risk factors for reinfection | Most frequent variant circulating at the time of reinfection in the area** | Immunity status before reinfection                    |
|--------------------------|---------------|------------------------------|-------------------------------------|-----------------------------|-------------------------------------------|-------------------------------|-------------------------------------------|----------------------|---------------------|-----------|---------------|----------------------------------------------|-----------|-----------------------------------------------------------------------------------------------------------------|---------------------------------------------------------|------------------------------|----------------------------------------------------------------------------|-------------------------------------------------------|
|                          |               |                              |                                     |                             |                                           |                               |                                           |                      | Age (years)         | Sex (M/F) | Comorbidities | Age (years)                                  | Sex (M/F) | Comorbidities                                                                                                   |                                                         |                              |                                                                            |                                                       |
| Gupta V. 2021 [13]       | Case series   | India, one hospital, HCWs*   | 21 August 2020 and 5 September 2020 | 2                           | -                                         | -                             | -                                         | -                    | -                   | -         | -             | 25 and 28                                    | 1/1       | None                                                                                                            | Mean $\pm$ SD: 109.5 $\pm$ 2.1, range: 108-111          | Not described                | Not available                                                              | Not available                                         |
| Lee J.S. 2020 [14]       | Case series   | South Korea, three hospitals | 18 March 2020 to 16 May 2020        | 6                           | -                                         | -                             | -                                         | -                    | -                   | -         | -             | Mean $\pm$ SD: 39.5 $\pm$ 20.3, range: 17-72 | 2/4       | Allergic rhinitis (n=1, 16.7%)<br>dyslipidaemia (n=1, 16.7%)<br>Parkinson (n=1, 16.7%), depression (n=1, 16.7%) | Mean $\pm$ SD: 30.7 $\pm$ 8.6, range: 24-47             | Not described                | Not available                                                              | 6/6 patients with positive IgG                        |
| Salehi-Vaziri. 2021 [15] | Case series   | Iran, one hospital           | 4 July 2020 to 22 August 2020       | 3                           | -                                         | -                             | -                                         | -                    | -                   | -         | -             | Mean $\pm$ SD: 42.7 $\pm$ 11.0               | 2/1       | Not described                                                                                                   | Mean $\pm$ SD: 110 $\pm$ 46.5, range: 63-111            | Not described                | Not available                                                              | 2/3 patients with positive IgG                        |
| Amoril MR. 2021 [16]     | Case series,  | Brazil, one hospital, HCW*   | 10 June 2020 to 5 October 2020      | 4                           | -                                         | -                             | -                                         | -                    | -                   | -         | -             | Mean $\pm$ SD: 44.0 $\pm$ 11.6               | 0/4       | Chronic bronchitis (n=1, 25.0%)                                                                                 | Mean $\pm$ SD: 126 $\pm$ 50, range: 55-170              | Not described                | Not available                                                              | 1/3 patients with positive IgG, 1 with no information |

|                       |             |                             |                                      |    |                                                      |   |   |   |   |   |   |                                                                  |      |                                                                     |                                         |               |                      |                                |
|-----------------------|-------------|-----------------------------|--------------------------------------|----|------------------------------------------------------|---|---|---|---|---|---|------------------------------------------------------------------|------|---------------------------------------------------------------------|-----------------------------------------|---------------|----------------------|--------------------------------|
| Yu ALF. 2021 [17]     | Case series | Brazil, one hospital, HCWs* | 17 November 2020 and 1 February 2021 | 2  | 1/2 patient vaccinated before the second infection   | - | - | - | - | - | - | 34 and 41                                                        | 1/1  | Gastroplasty (n=1, 50.0%), chronic respiratory disease (n=1, 50.0%) | Mean ± SD: 159.5 ± 19.1, range: 146-173 | Not described | 20 J (Gamma, V3)     | Not available                  |
| Naveca FG. 2021 [18]  | Case series | Brazil, one hospital        | December 2020 to June 2021           | 25 | 2/25 patients vaccinated before the second infection | - | - | - | - | - | - | Age ranged from 17 to 73 years, No information on mean or median | 9/16 | 80% (no detail)                                                     | Mean ± SD: 242.5 ± 75.6, range: 92-387  | Not described | Delta (21J, 21A 21I) | Not available                  |
| Sanyan g B. 2021 [19] | Case series | Gambia, one hospital        | 21 January 2021 and 1 February 2021  | 2  | -                                                    | - | - | - | - | - | - | 31 and 36                                                        | 0/2  | None                                                                | Mean ± SD: 164.5 ± 29.0, range: 144-185 | Not described | 20 I (Alpha, V1)     | Not available                  |
| Sonié P. 2022 [20]    | Case series | Portugal, one hospital      | Before 2021                          | 2  | -                                                    | - | - | - | - | - | - | 60 and 25                                                        | 1/1  | Partial nephrectomy (n=1, 50.0%)                                    | Mean ± SD: 119.5 ± 34.6, range: 95-145  | Not described | Delta (21J)          | 0/2 patients with positive IgG |

|                            |                    |                               |                                   |                                                                                                                                                                                                                                          |   |                                                                              |                                  |     |                                                       |                                         |               |                                                        |                                   |               |                           |                                                                                                       |                  |                                 |
|----------------------------|--------------------|-------------------------------|-----------------------------------|------------------------------------------------------------------------------------------------------------------------------------------------------------------------------------------------------------------------------------------|---|------------------------------------------------------------------------------|----------------------------------|-----|-------------------------------------------------------|-----------------------------------------|---------------|--------------------------------------------------------|-----------------------------------|---------------|---------------------------|-------------------------------------------------------------------------------------------------------|------------------|---------------------------------|
| Abu-Radda d. 2021 [21]     | Prospective cohort | Qatar, national study         | 28 February 2020 to 28 April 2021 | 1339 reinfections (a PCR-positive swab $\geq$ 90 days after the first infection), 1304 individuals that could be matched with 6288 primary infection in a 1: 5 ratio by sex, 5 year age group and nationality and PCR test calendar week | - | 265 779                                                                      | All patients were not vaccinated | 0.5 | Median: 32, range: 26-39 (for 6288 primary infection) | 5 499/789 (for 6 288 primary infection) | Not described | Median: 32, range: 26-39 (for 1 304 reinfection cases) | 1 130/174 (for 1304 reinfection)) | Not described | Median: 277, range:79-315 | Not described                                                                                         | 20H (Beta, V2)   | Not available                   |
| Ali A.M. 2021 [22]         | Prospective cohort | Iraq, one hospital            | May to mid-October 2020           | 26                                                                                                                                                                                                                                       | - | 829                                                                          | -                                | 3.1 | Not described                                         | Not described                           | Not described | Mean $\pm$ SD: 39.6 $\pm$ 9.8, range: 14-55 years      | 14/12                             | Not described | Not described             | Lack of anti-nucleocapside IgG in recovered COVID-19 patients may be associated with reinfection risk | 20E (EU1)        | 1/26 patients with positive IgG |
| Jeffrey-Smith A. 2021 [23] | Prospective cohort | United Kingdom, 13 care homes | 10 April 2020 to 31 January 2021  | 10 confirmed infections (eight probable, and five possible infection were excluded)                                                                                                                                                      | - | 1 377 (including 656 previously infected patients and 721 primary infection) | -                                | 0.7 | Not described                                         | Not described                           | Not described | Not described                                          | 1/9                               | Not described | Not described             | Not described                                                                                         | 20 I (Alpha, V1) | 6/10 patients with positive IgG |

|                                |                        |                                                                                                                                                                         |                                          |        |                                                                              |           |   |     |                                |                           |               |                                      |             |               |                           |                                                                                                                                                              |                     |                  |
|--------------------------------|------------------------|-------------------------------------------------------------------------------------------------------------------------------------------------------------------------|------------------------------------------|--------|------------------------------------------------------------------------------|-----------|---|-----|--------------------------------|---------------------------|---------------|--------------------------------------|-------------|---------------|---------------------------|--------------------------------------------------------------------------------------------------------------------------------------------------------------|---------------------|------------------|
| Mensa<br>h AA.<br>2022<br>[24] | Prospecti<br>ve cohort | United<br>Kingdom,<br>national<br>study                                                                                                                                 | 27 May<br>2020 to 2<br>May 2021          | 13 960 | 5 858 /13<br>960 patients<br>vaccinated<br>before the<br>second<br>infection | 3 860 054 | - | 0.4 | Median:<br>39, range:<br>25-55 | 1 814 228<br>/<br>2045826 | Not described | Median: 48<br>years, range:<br>31-65 | 4 607/9 353 | Not described | Not described             | Increased<br>risk of<br>reinfection<br>was<br>observed in<br>the oldest<br>age<br>categories<br>(70–79 years<br>old and 80+)<br>and in<br>female<br>patients | 20 I (Alpha,<br>V1) | Not<br>available |
| Rivelli<br>A.<br>2022<br>[25]  | Prospecti<br>ve cohort | United<br>States, a<br>large<br>Midwestern<br>healthcare<br>system (26<br>hospitals<br>and over<br>500<br>healthcare<br>sites in<br>Illinois and<br>Wisconsin),<br>HCWs | 1 March<br>2020 to 10<br>January<br>2021 | 156    | -                                                                            | 2 625     | - | 5.9 | Mean ±<br>SD:<br>38.3±11.6     | 361/2264                  | Not described | Mean ± SD:<br>37.8±10.6              | 14/142      | Not described | Mean ±SD:<br>141.2 ± 42.8 | Not<br>described                                                                                                                                             | 21C<br>(Epsilon)    | Not<br>available |



|                        |                    |                        |                                    |                                                     |                                                                                |                                                           |                                                                                              |     |                                            |               |               |                          |               |                                                                                                                                                                                                                                                     |                          |               |                              |                                   |
|------------------------|--------------------|------------------------|------------------------------------|-----------------------------------------------------|--------------------------------------------------------------------------------|-----------------------------------------------------------|----------------------------------------------------------------------------------------------|-----|--------------------------------------------|---------------|---------------|--------------------------|---------------|-----------------------------------------------------------------------------------------------------------------------------------------------------------------------------------------------------------------------------------------------------|--------------------------|---------------|------------------------------|-----------------------------------|
| Nguyen NN. 2022 [26]   | Prospective cohort | France, one hospital   | 19 March 2020 to 28 August 2021    | 209                                                 | 207 patients with available information on vaccination and none was vaccinated | 55 338                                                    | 202 reinfected patients with available information on vaccination, 13/202 vaccinated patient | 0.4 | Not described                              | Not described | Not described | Mean ± SD : 40.4 ± 19.8  | 101/108       | 177/209 patients with available information on comorbidities, chronic respiratory disease (n=26, 14.7%), chronic heart disease (n=23, 13.0%), hypertension (n=20, 11.3%) obesity (n=20, 11.3%), diabetes (n=12, 6.8%), immunodepression (n=5, 2.8%) | Mean ±SD 232.9 ± 104.0   | Not described | Delta (21A)                  | 33/39 patients with positive Ig G |
| Altarneh HN. 2022 [27] | Prospective cohort | Qatar, national study  | 8 June 2022 to 4 July 2022         | 198, all (reinfected with Omicron BA.4/BA.5)        | -                                                                              | 6 859                                                     | -                                                                                            | 2.9 | Not described                              | Not described | Not described | Median: 36, range: 29-51 | 88/110        | Not described                                                                                                                                                                                                                                       | Not described            | Not described | Omicron (22B, 22A, 21L, 22C) | Not available                     |
| Brouqui P. 2021 [28]   | Prospective cohort | France, one hospital   | 27 January 2020 to 12 January 2021 | 46                                                  | -                                                                              | 6 771                                                     | -                                                                                            | 0.7 | Not described                              | Not described | Not described | Mean ± SD: 50.0 ± 22.0   | 25/21         | 39/46 patients with information of comorbidities, hypertension (n=8, 20.5%), diabetes (n=5, 12.8%), obesity (n=4, 10.3%), asthma (n=4, 10.3%), chronic heart disease (n=3, 7.7%)                                                                    | Mean: 172, range: 90-308 | Not described | 20A .EU2                     | Not available                     |
| Fonager J. 2022 [29]   | Prospective cohort | Denmark, multi centres | 29 November 2021 to 2 January 2022 | 1 128, including 970 BA.1 and 158 BA.2 reinfections | -                                                                              | 18 760, including 16 137 BA.1 and 2 623 BA.2 reinfections | -                                                                                            | 6.0 | Median 31 for BA.1 and median: 32 for BA.2 | Not described | Not described |                          | Not described | Not described                                                                                                                                                                                                                                       | Not described            | Not described | Delta (21J, 21I)             | Not available                     |

|                        |                      |                                       |                                    |                                                              |                                                                                        |         |                                                                                                                     |     |                        |               |                                                                                                                                                                                |                                 |               |                                                                                                                                                                                                 |                                                                             |                                                                                                          |                         |                                |
|------------------------|----------------------|---------------------------------------|------------------------------------|--------------------------------------------------------------|----------------------------------------------------------------------------------------|---------|---------------------------------------------------------------------------------------------------------------------|-----|------------------------|---------------|--------------------------------------------------------------------------------------------------------------------------------------------------------------------------------|---------------------------------|---------------|-------------------------------------------------------------------------------------------------------------------------------------------------------------------------------------------------|-----------------------------------------------------------------------------|----------------------------------------------------------------------------------------------------------|-------------------------|--------------------------------|
| Good MK. 2022 [30]     | Prospective cohort   | USA, 21 universities                  | 1 January 2021 to 30 November 2021 | 11                                                           | 1/11 partially vaccinated and seven/11 fully vaccinated                                | 1 378   | 92 /1 378 partially vaccinated and 846/1 378 fully vaccinated                                                       | 0.8 | Not described          | 800/577/1     | Not described                                                                                                                                                                  | Not described                   | Not described | None                                                                                                                                                                                            | Mean: 197.5, range: 95-301                                                  | Not described                                                                                            | Delta (21J, 21I)        | Not available                  |
| Mack CD. 2022 [31]     | Prospective cohort   | USA, one hospital                     | 1 March 2020 to 30 May 2021        | 7                                                            | -                                                                                      | 7 980   | -                                                                                                                   | 0.1 | Not described          | Not described | Not described                                                                                                                                                                  | Mean: 30, range: 19-44 years    | 7/0           | Immunocompromised (n=1, 14.3%)                                                                                                                                                                  | Mean ±SD : 151.7 ± 66.0                                                     | Not described                                                                                            | 20 I (Alpha, V1)        | 6/7 patients with positive IgG |
| Guedes A.R. 2023 [32]  | Prospective cohort   | Brazil, one hospital                  | 10 March 2020 to 10 March 2022     | 284, including 281 HCWs                                      | -                                                                                      | 5865    | 281 patients with information on vaccination, including 181 with two doses, 90 with three doses and 10 unvaccinated | 4.8 | Not described          | Not described | Not described                                                                                                                                                                  | Median: 39 (range: 30-47 years) | 202/82        | n=62 (, cardiovascular including hypertension (n= 42, 14.8%), diabetes (n=15, 5.3%), chronic respiratory disease (n=7, 2.5%), malignancy (n=6, 2.1%), obesity (n=5,1.8%), pregnancy (n=1, 0.4%) | Mean 429, range: 122-674 days and 507,(range: 122-674) in the during period | Risk of reinfection was higher during the Omicron period                                                 | Omicron (21K, 21L)      | Not available                  |
| Ellingson K. 2023 [33] | Prospective cohort   | USA, 8 US locations in Arizona, HCWs* | December 2021 to April 2022        | 318, including only patients reinfected with Omicron variant | 5 with one dose, 107 with 2 doses and (81) with three doses                            | 4707    | 34 with one dose, 646 with two doses and 513 with three doses                                                       | 6.8 | Age groups             | Not described | 489, not described                                                                                                                                                             | Age groups                      | 144/174       | n= 106, not detailed                                                                                                                                                                            | Not described                                                               | Risk of reinfection was lower in patients with 2 or 3 doses of vaccine                                   | Omicron (21L, 21K, 21C) | Not available                  |
| Flacco ME. 2022 [34]   | Retrospective cohort | Italy, Abruzzo Region                 | 2 March 2020 to 18 February 2022   | 729                                                          | 204 /729 partially vaccinated and 182/729 fully vaccinated before the second infection | 119 266 | -                                                                                                                   | 0.6 | Mean ± SD: 41.6 ± 21.9 | 58 783/60 483 | Hypertension (n=11 069; 9.3%), diabetes (n=5 042; 4.2%), cardiovascular disease (n=9 916, 8.3%), COPD** (n=33 718; 3.1%), kidney disease (n=1 517;1.3%), cancer (n=4 119;3.5%) | Mean ±SD: 35.2 ± 21.6           | 312/417       | Hypertension (n=44, 6.0%), chronic heart disease (n=37, 5.1%), diabetes (n=26, 3.6%), COPD** (n=21, 2.9%), cancer (n=16, 2.2%), chronic kidney disease (n=4, 0.6%)                              | Mean: 277                                                                   | Risk of reinfection was higher in female, younger, and unvaccinated patients and during the Omicron wave | Omicron (21K, 21L)      | Not available                  |

|                       |                      |                                                                                                 |                                      |      |                                                                                                                     |         |                                                               |     |               |               |               |                                                                     |           |                                                                                                                                                                                                                                                                                                                                                                                                       |                           |                                                                                                                                                                |                       |               |
|-----------------------|----------------------|-------------------------------------------------------------------------------------------------|--------------------------------------|------|---------------------------------------------------------------------------------------------------------------------|---------|---------------------------------------------------------------|-----|---------------|---------------|---------------|---------------------------------------------------------------------|-----------|-------------------------------------------------------------------------------------------------------------------------------------------------------------------------------------------------------------------------------------------------------------------------------------------------------------------------------------------------------------------------------------------------------|---------------------------|----------------------------------------------------------------------------------------------------------------------------------------------------------------|-----------------------|---------------|
| Perez G. 2021 [35]    | Retrospective cohort | Israel, Maccabi Health Care Service computerised database (approximately 25% of the population) | 16 March 2020 to 27 January 2021     | 154  | -                                                                                                                   | 149 735 | -                                                             | 0.1 | Not described | Not described | Not described | Mean ± SD : 31.5 ± 19.7                                             | 94/60     | Immunocompromised (n=5, 3.2%)                                                                                                                                                                                                                                                                                                                                                                         | Mean ± SD: 165.7 ± 57.6   | Not described                                                                                                                                                  | 20 I (Alpha, V1)      | Not available |
| Pilz S. 2021 [36]     | Retrospective cohort | Austria, national study                                                                         | 1 September 2020 to 30 November 2020 | 40   | -                                                                                                                   | 14 840  | -                                                             | 0.3 | Not described | Not described | Not described | Mean ± SD: 44.2 ± 21.5                                              | 15/25     | Not described                                                                                                                                                                                                                                                                                                                                                                                         | Mean ± SD: 212 ± 25       | Not described                                                                                                                                                  | 20A .EU2              | Not available |
| Malhotra S. 2022 [37] | Retrospective cohort | India, one hospital, HCWs*                                                                      | 3 March 2020 to 18 June 2021         | 116  | 39/116 partially vaccinated and 17/116 fully vaccinated before the second infection                                 | 1 917   | 356/1917 partially vaccinated and 1 089/1917 fully vaccinated | 6.1 | Not described | 1 107/810     | Not described | Not described                                                       | 62/54     | Not described                                                                                                                                                                                                                                                                                                                                                                                         | Median: 183, range: 13-61 | Full vaccination was associated with a lower risk of reinfection                                                                                               | Delta (21I, 21A, 21I) | Not available |
| Alotaiby M. 2022 [38] | Retrospective cohort | Saudi Arabia, national study                                                                    | 1 March 2020 to 1 December 2021      | 4454 | 1474/4454 vaccinated, including 1453 vaccinated before the second infection) and 21 vaccinated the third infection) | 556750  |                                                               | 0.8 | Not described | Not described | Not described | Mean ± SD: 33 ± 12 (second infection) and 33 ± 12 (third infection) | 2847/1607 | 1029/4454, diabetes (n=197, 4.4%), hypertension (n=186, 4.2%), obesity (n=166, 3.7%), respiratory disease (n=132, 3.0%), cardiovascular disease (n=118, 2.6%), cancer (n=54, 1.2%), HIV (n=43, 1.0%), pregnancy (n=43), , chronic kidney disease (n=26, n=0.6%), immunosuppressive drug (n=25, n=0.6%), sickle cell anaemia (n=23, 0.5%), history of stroke (n=8, 0.2%), organ transplant (n=8, 0.2%) | Not described             | Risk of reinfection was higher in patients with comorbidities and in those reinfected with delta variant. Risk of reinfection was lower in vaccinated patients | Delta (21I)           | Not available |

(\*) HCW = healthcare workers, (\*\*) COPD = chronic obstructive pulmonary disease

(\*\*) Most frequent variant circulating at the time of reinfection in the area (information available from: <https://covariants.org/>)

**Supplementary Table S2.** NICE quality assessment for case series.

| Study              | Was the study question or objective clearly stated? | Was the study population clearly and fully described, including a case definition? | Were the cases consecutive? | Were the patients comparable? | Was the intervention clearly described? | Were the outcomes measured clearly defined, valid, reliable, and implemented consistently across all study participants? | Was the length of follow-up adequate? | Were the statistical methods well-described? | Were the results well-described? | Total score | Total quality score |
|--------------------|-----------------------------------------------------|------------------------------------------------------------------------------------|-----------------------------|-------------------------------|-----------------------------------------|--------------------------------------------------------------------------------------------------------------------------|---------------------------------------|----------------------------------------------|----------------------------------|-------------|---------------------|
| Gupta V. 2021      | 1                                                   | 1                                                                                  | 1                           | NA                            | 1                                       | 1                                                                                                                        | 1                                     | NA                                           | 1                                | 7           | Good                |
| Lee J.S. 2020      | 1                                                   | 1                                                                                  | 1                           | NA                            | 1                                       | 1                                                                                                                        | 1                                     | NA                                           | 1                                | 7           | Good                |
| Salehi-Vaziri.2021 | 1                                                   | 1                                                                                  | 1                           | NA                            | 1                                       | 1                                                                                                                        | 1                                     | NA                                           | 1                                | 7           | Good                |
| Yu ALF.2021        | 1                                                   | 1                                                                                  | 1                           | NA                            | 1                                       | 1                                                                                                                        | 1                                     | NA                                           | 1                                | 7           | Good                |
| Amoril MR.2021     | 1                                                   | 1                                                                                  | 1                           | NA                            | 1                                       | 1                                                                                                                        | 1                                     | NA                                           | 1                                | 7           | Good                |
| Naveca FG. 2021    | 1                                                   | 1                                                                                  | 1                           | NA                            | 1                                       | 1                                                                                                                        | 1                                     | 1                                            | 1                                | 8           | Good                |
| Sanyang B. 2021    | 1                                                   | 1                                                                                  | 1                           | NA                            | 1                                       | 1                                                                                                                        | 1                                     | NA                                           | 1                                | 7           | Good                |
| Sonié P. 2022      | 1                                                   | 1                                                                                  | 1                           | NA                            | 1                                       | 1                                                                                                                        | 1                                     | NA                                           | 1                                | 7           | Good                |

**Supplementary Table S3.** Newcastle-Ottawa Scale (NOS) quality assessment of cohort studies.

| Studies               | Selection                                |                                     |                           |                                                       | Comparability | Exposure              |                      |                                 | Total score | Total quality score |
|-----------------------|------------------------------------------|-------------------------------------|---------------------------|-------------------------------------------------------|---------------|-----------------------|----------------------|---------------------------------|-------------|---------------------|
| Author, year          | Representativeness of the exposed cohort | Selection of the non-exposed cohort | Ascertainment of exposure | Outcome of Interest was not present at start of study | Comparability | Assessment of outcome | Sufficient follow-up | Adequacy of follow-up of cohort |             |                     |
| Abu-Raddad.2021       | 1                                        | 1                                   | 1                         | 1                                                     | 1             | 1                     | 1                    | 1                               | 8           | Good                |
| Ali A.M.2021          | 1                                        | 0                                   | 1                         | 1                                                     | NA            | 1                     | 1                    | 1                               | 6           | Fair                |
| Jeffrey-Smith A. 2021 | 1                                        | 0                                   | 1                         | 1                                                     | NA            | 1                     | NA                   | NA                              | 4           | Fair                |
| Mensah AA. 2022       | 1                                        | 1                                   | 1                         | 1                                                     | 1             | 1                     | 1                    | 1                               | 8           | Good                |
| Rivelli A. 2022       | 1                                        | 0                                   | 1                         | 1                                                     | NA            | 1                     | 1                    | 1                               | 6           | Fair                |
| Nguyen NN.2022        | 1                                        | 1                                   | 1                         | 1                                                     | 1             | 1                     | 1                    | 1                               | 8           | Good                |
| Altarawneh HN. 2022   | 1                                        | 1                                   | 1                         | 1                                                     | 1             | 1                     | NA                   | 1                               | 7           | Good                |
| Brouqui P. 2021       | 1                                        | 0                                   | 1                         | 1                                                     | NA            | 1                     | 1                    | 1                               | 6           | Fair                |
| Fonager J. 2022       | 1                                        | 0                                   | 1                         | 1                                                     | 1             | 1                     | NA                   | 1                               | 6           | Fair                |
| Good MK.              | 1                                        | 0                                   | 1                         | 1                                                     | NA            | 1                     | 1                    | 1                               | 6           | Fair                |

|                      |   |   |   |   |    |   |    |    |   |      |
|----------------------|---|---|---|---|----|---|----|----|---|------|
| 2022                 |   |   |   |   |    |   |    |    |   |      |
| Mack CD.<br>2022     | 1 | 0 | 1 | 1 | NA | 1 | NA | NA | 4 | Fair |
| Guedes A.R.<br>2023  | 1 | 0 | 1 | 1 | NA | 1 | 1  | 1  | 6 | Fair |
| Ellingson K.<br>2023 | 1 | 1 | 1 | 1 | NA | 1 | 1  | 1  | 7 | Good |
| Flacco<br>ME.2022    | 1 | 1 | 1 | 1 | NA | 1 | 1  | 1  | 7 | Good |
| Perez G.<br>2021     | 1 | 0 | 1 | 1 | NA | 1 | 1  | 1  | 6 | Fair |
| Pilz S. 2021         | 1 | 0 | 1 | 1 | NA | 1 | 1  | 1  | 6 | Fair |
| Malhotra S.<br>2022  | 1 | 0 | 1 | 1 | 1  | 1 | NA | 1  | 6 | Fair |
| Al-Otaiby<br>M. 2022 | 1 | 1 | 1 | 1 | NA | 1 | 1  | 1  | 7 | Good |

**Supplementary Table S4.** SARS-CoV-2 variant among 2354 reinfected patients.

| <b>Reference</b>           | <b>Patient number with identified variant</b> | <b>Variant for the second infection</b>                                                           |
|----------------------------|-----------------------------------------------|---------------------------------------------------------------------------------------------------|
| Yu ALF. 2021 [17]          | 2                                             | B.1.1.28 and one patient with mutation E484K                                                      |
| Naveca FG. 2021 [18]       | 25                                            | VOc Gama (lignage P.1, n=21) Gamma plus with lineage P.1.1.7 (n=2) P.1.1.2 (n=1) and P.1.14 (n=1) |
| Sanyang B. 2021 [19]       | 2                                             | Lineage B.1.235 and lineage B.1                                                                   |
| Abu-Raddad. 2021 [21]      | 683                                           | B.1.351 ( Beta, n=413), B.1.1.7 (Alpha, n=57), wild-type (n=213)                                  |
| Jeffrey-Smith A. 2021 [23] | 7                                             | 7/10 patients, 6 patients reinfected with alpha (B.1.1.7) and one patient with B.1.36.28          |
| Nguyen NN. 2022 [26]       | 159                                           | 21A Delta (B.1.617.2, n=100), 20A.EU2 (B.1.160, n=34), 20I (Alpha.V1, B.1.1.7, n=25)              |
| Altarawneh HN. 2022 [27]   | 198                                           | Omicron BA.4 and/ or BA.5                                                                         |
| Mack CD. 2022 [31]         | 3                                             | B.1.2 (n=1), B.1.1.7, (n=1), B.0.1.2 (n=1)                                                        |
| Ellingson K. 2023 [33]     | 318                                           | Omicron variant                                                                                   |
| Alotaiby M. 2022 [38]      | 957                                           | Delta (844), beta (49), alpha (29), wild-type (35)                                                |



**Supplementary Table S5.** Prevalence of comorbidities in 5873 reinfected patients.

| Symptoms                             | Number | Proportion |
|--------------------------------------|--------|------------|
| Hypertension                         | 258    | 4.4        |
| Diabetes                             | 255    | 4.3        |
| Obesity                              | 195    | 3.3        |
| Chronic respiratory disease          | 192    | 3.3        |
| Heart disease                        | 181    | 3.1        |
| COPD                                 | 48     | 0.8        |
| Pregnancy                            | 44     | 0.7        |
| HIV                                  | 43     | 0.7        |
| Heart disease including hypertension | 42     | 0.7        |
| Immunocompromised                    | 36     | 0.6        |
| Kidney disease                       | 30     | 0.5        |
| Organ transplant                     | 8      | 0.1        |
| History of stroke                    | 8      | 0.1        |
| Asthma                               | 4      | 0.1        |
| Partial nephrectomy                  | 1      | 0.0        |
| Parkinson                            | 1      | 0.0        |
| Gastroplasty                         | 1      | 0.0        |
| Dyslipidemia                         | 1      | 0.0        |
| Depression                           | 1      | 0.0        |
| chronic bronchitis                   | 1      | 0.0        |
| Allergic rhinitis                    | 1      | 0.0        |
